# Supplementary material for: Operational taxon pairs in microbial co-occurrence networks imply complicated bacterial associations
Source: Research Square preprint supplement (doi:10.21203/rs.3.rs-1535010/v1), 2022-04-11
Supplement: Supplementary file 1 [file fc4e1b44d78e64cc18c7cd4a.xlsx]

## Sheet: Table S1
Supplementary Table S1: Two-sides barcode primer sequence.
Primers for high throughput identification
515F	GTGCCAGCMGCCGCGGTAA
806R	GGACTACHVGGGTWTCTAAT
Forward barcoded primer
Well in the plate	Primer ID	Primer sequence Barcode+515F
A1	F1	AACGCACGCTAGGTGCCAGCMGCCGCGGTAA
A2	F2	ACCAGCGACTAGGTGCCAGCMGCCGCGGTAA
A3	F3	AGCAGTCGCGATGTGCCAGCMGCCGCGGTAA
A4	F4	AGGCTACACGACGTGCCAGCMGCCGCGGTAA
A5	F5	AATCAGTCTCGTGTGCCAGCMGCCGCGGTAA
A6	F6	ACTGATCCTAGTGTGCCAGCMGCCGCGGTAA
A7	F7	AGATACACGCGCGTGCCAGCMGCCGCGGTAA
A8	F8	ACATGTCACGTGGTGCCAGCMGCCGCGGTAA
A9	F9	ACATTCAGCGCAGTGCCAGCMGCCGCGGTAA
A10	F10	ATACTATTGCGCGTGCCAGCMGCCGCGGTAA
A11	F11	ATTCTGTGAGCGGTGCCAGCMGCCGCGGTAA
A12	F12	CACGTCGATGGAGTGCCAGCMGCCGCGGTAA
B1	F13	ACACTGTTCATGGTGCCAGCMGCCGCGGTAA
B2	F14	ACGGATCGTCAGGTGCCAGCMGCCGCGGTAA
B3	F15	AGGACGCACTGTGTGCCAGCMGCCGCGGTAA
B4	F16	AAGCTGCAGTCGGTGCCAGCMGCCGCGGTAA
B5	F17	ACGACGTCTTAGGTGCCAGCMGCCGCGGTAA
B6	F18	AGAGTCCTGAGCGTGCCAGCMGCCGCGGTAA
B7	F19	AGCGCTGATGTGGTGCCAGCMGCCGCGGTAA
B8	F20	ACGCGATACTGGGTGCCAGCMGCCGCGGTAA
B9	F21	ACTTGTAGCAGCGTGCCAGCMGCCGCGGTAA
B10	F22	ATGCACTGGCGAGTGCCAGCMGCCGCGGTAA
B11	F23	CACGGACTATACGTGCCAGCMGCCGCGGTAA
B12	F24	CAGCACTAAGCGGTGCCAGCMGCCGCGGTAA
C1	F25	ACCAGACGATGCGTGCCAGCMGCCGCGGTAA
C2	F26	AGCTTGACAGCTGTGCCAGCMGCCGCGGTAA
C3	F27	AAGAGATGTCGAGTGCCAGCMGCCGCGGTAA
C4	F28	ACAGCTAGCTTGGTGCCAGCMGCCGCGGTAA
C5	F29	ACGTGAGAGAATGTGCCAGCMGCCGCGGTAA
C6	F30	AGCGAGCTATCTGTGCCAGCMGCCGCGGTAA
C7	F31	ACACATGTCTACGTGCCAGCMGCCGCGGTAA
C8	F32	ACTACGTGTGGTGTGCCAGCMGCCGCGGTAA
C9	F33	AGATGTTCTGCTGTGCCAGCMGCCGCGGTAA
C10	F34	CAGATACACTTCGTGCCAGCMGCCGCGGTAA
C11	F35	CAGATCGGATCGGTGCCAGCMGCCGCGGTAA
C12	F36	CATAGACGTTCGGTGCCAGCMGCCGCGGTAA
D1	F37	ACGCTCATGGATGTGCCAGCMGCCGCGGTAA
D2	F38	AACTGTGCGTACGTGCCAGCMGCCGCGGTAA
D3	F39	ACAGCAGTGGTCGTGCCAGCMGCCGCGGTAA
D4	F40	ACCTGTCTCTCTGTGCCAGCMGCCGCGGTAA
D5	F41	ACTGACAGCCATGTGCCAGCMGCCGCGGTAA
D6	F42	AGTACTGCAGGCGTGCCAGCMGCCGCGGTAA
D7	F43	ACATGATCGTTCGTGCCAGCMGCCGCGGTAA
D8	F44	ACTGTGACTTCAGTGCCAGCMGCCGCGGTAA
D9	F45	AGCTCCATACAGGTGCCAGCMGCCGCGGTAA
D10	F46	CAGTGTCAGGACGTGCCAGCMGCCGCGGTAA
D11	F47	CATACCAGTAGCGTGCCAGCMGCCGCGGTAA
D12	F48	AGTGTCACGGTGGTGCCAGCMGCCGCGGTAA
E1	F49	ACTCACGGTATGGTGCCAGCMGCCGCGGTAA
E2	F50	ACCGCAGAGTCAGTGCCAGCMGCCGCGGTAA
E3	F51	ACGTACTCAGTGGTGCCAGCMGCCGCGGTAA
E4	F52	ACGTCTGTAGCAGTGCCAGCMGCCGCGGTAA
E5	F53	AGCGACTGTGCAGTGCCAGCMGCCGCGGTAA
E6	F54	ACACACTATGGCGTGCCAGCMGCCGCGGTAA
E7	F55	ACGCAACTGCTAGTGCCAGCMGCCGCGGTAA
E8	F56	AGATCTCTGCATGTGCCAGCMGCCGCGGTAA
E9	F57	ACGCTATCTGGAGTGCCAGCMGCCGCGGTAA
E10	F58	AGTGCGATGCGTGTGCCAGCMGCCGCGGTAA
E11	F59	AGTGGATGCTCTGTGCCAGCMGCCGCGGTAA
E12	F60	ATAGGCGATCTCGTGCCAGCMGCCGCGGTAA
F1	F61	AGACCGTCAGACGTGCCAGCMGCCGCGGTAA
F2	F62	ACGGTGAGTGTCGTGCCAGCMGCCGCGGTAA
F3	F63	ACTCGCACAGGAGTGCCAGCMGCCGCGGTAA
F4	F64	AGAGCAAGAGCAGTGCCAGCMGCCGCGGTAA
F5	F65	AGTACGCTCGAGGTGCCAGCMGCCGCGGTAA
F6	F66	ACGATGCGACCAGTGCCAGCMGCCGCGGTAA
F7	F67	ACTGTCGAAGCTGTGCCAGCMGCCGCGGTAA
F8	F68	AGCTATCCACGAGTGCCAGCMGCCGCGGTAA
F9	F69	ACTATTGTCACGGTGCCAGCMGCCGCGGTAA
F10	F70	ATACTCACTCAGGTGCCAGCMGCCGCGGTAA
F11	F71	ATAGCTCCATACGTGCCAGCMGCCGCGGTAA
F12	F72	ATCTACTACACGGTGCCAGCMGCCGCGGTAA
G1	F73	AGCACGAGCCTAGTGCCAGCMGCCGCGGTAA
G2	F74	ACTCGATTCGATGTGCCAGCMGCCGCGGTAA
G3	F75	AGAGAGCAAGTGGTGCCAGCMGCCGCGGTAA
G4	F76	AGCCATACTGACGTGCCAGCMGCCGCGGTAA
G5	F77	AATCGTGACTCGGTGCCAGCMGCCGCGGTAA
G6	F78	ACGTTAGCACACGTGCCAGCMGCCGCGGTAA
G7	F79	AGCGTAGGTCGTGTGCCAGCMGCCGCGGTAA
G8	F80	AGTCCATAGCTGGTGCCAGCMGCCGCGGTAA
G9	F81	AGAACACGTCTCGTGCCAGCMGCCGCGGTAA
G10	F82	ATCGCTCGAGGAGTGCCAGCMGCCGCGGTAA
G11	F83	ATCGTACAACTCGTGCCAGCMGCCGCGGTAA
G12	F84	ATGCGTAGTGCGGTGCCAGCMGCCGCGGTAA
H1	F85	ACAGACCACTCAGTGCCAGCMGCCGCGGTAA
H2	F86	AGACTGCGTACTGTGCCAGCMGCCGCGGTAA
H3	F87	AGCATATGAGAGGTGCCAGCMGCCGCGGTAA
H4	F88	AGGTGTGATCGCGTGCCAGCMGCCGCGGTAA
H5	F89	ACGAGTGCTATCGTGCCAGCMGCCGCGGTAA
H6	F90	ACTGTACGCGTAGTGCCAGCMGCCGCGGTAA
H7	F91	ACACGAGCCACAGTGCCAGCMGCCGCGGTAA
H8	F92	ACACGGTGTCTAGTGCCAGCMGCCGCGGTAA
H9	F93	AGTGAGAGAAGCGTGCCAGCMGCCGCGGTAA
H10	F94	ATGCAGCTCAGTGTGCCAGCMGCCGCGGTAA
H11	F95	CAACACGCACGAGTGCCAGCMGCCGCGGTAA
H12	F96	CATAGCGAGTTCGTGCCAGCMGCCGCGGTAA
Reverse barcoded primer
Plate ID	Primer ID	Primer sequence Barcode+806R
1	R1	GAACGTCGGTAAGGACTACHVGGGTWTCTAAT
2	R2	TCTCAGGTCACTGGACTACHVGGGTWTCTAAT
3	R3	GGGGGAATCCGAGGACTACHVGGGTWTCTAAT
4	R4	TTACGTACCTTGGGACTACHVGGGTWTCTAAT
5	R5	GGTTCATGAGGAGGACTACHVGGGTWTCTAAT
6	R6	TTTGTGACTGACGGACTACHVGGGTWTCTAAT
7	R7	GCCACGTATTCGGGACTACHVGGGTWTCTAAT
8	R8	TCGTCTCCTAGAGGACTACHVGGGTWTCTAAT
9	R9	GGTGTAGTTGCGGGACTACHVGGGTWTCTAAT
10	R10	TTTGGAGATACGGGACTACHVGGGTWTCTAAT
11	R11	GGACAGGTGTACGGACTACHVGGGTWTCTAAT
12	R12	TTTGTAATGCCGGGACTACHVGGGTWTCTAAT
13	R13	GATGTCAGACGAGGACTACHVGGGTWTCTAAT
14	R14	TCCTGATAGGCTGGACTACHVGGGTWTCTAAT
15	R15	GGCTTGGTACAGGGACTACHVGGGTWTCTAAT
16	R16	TTTGCAAGGTCTGGACTACHVGGGTWTCTAAT
17	R17	GGAGGCTATCCTGGACTACHVGGGTWTCTAAT
18	R18	TTTAATGGAAGGGGACTACHVGGGTWTCTAAT
19	R19	GAGGTCAAGGACGGACTACHVGGGTWTCTAAT
20	R20	TCGGGTTACGCAGGACTACHVGGGTWTCTAAT
21	R21	GGAAAGTCTGTGGGACTACHVGGGTWTCTAAT
22	R22	TTGCGCACGTAAGGACTACHVGGGTWTCTAAT
23	R23	GGTCAACCTTGGGGACTACHVGGGTWTCTAAT
24	R24	TTTGATTGCGTGGGACTACHVGGGTWTCTAAT
25	R25	GAAGACCTGGAAGGACTACHVGGGTWTCTAAT
26	R26	GGCTGTACTCTCGGACTACHVGGGTWTCTAAT
27	R27	TTGTGTAACGACGGACTACHVGGGTWTCTAAT
28	R28	GGAAATTCCTCCGGACTACHVGGGTWTCTAAT
29	R29	TTCTGTGTTCCTGGACTACHVGGGTWTCTAAT
30	R30	GAGTAAGCACTGGGACTACHVGGGTWTCTAAT
31	R31	TCCACTAGCAAGGGACTACHVGGGTWTCTAAT
32	R32	GGTGTGCTTCCAGGACTACHVGGGTWTCTAAT
33	R33	TTCAGCTTAGCTGGACTACHVGGGTWTCTAAT
34	R34	GGGTAACCGTTCGGACTACHVGGGTWTCTAAT
35	R35	TTTGGACATTCCGGACTACHVGGGTWTCTAAT
36	R36	GACTAGACCGTAGGACTACHVGGGTWTCTAAT
37	R37	TCTCGATACTGGGGACTACHVGGGTWTCTAAT
38	R38	GGTCTGCGTAGAGGACTACHVGGGTWTCTAAT
39	R39	TTGGTCGGTTACGGACTACHVGGGTWTCTAAT
40	R40	GGCTATGACGTCGGACTACHVGGGTWTCTAAT
41	R41	TTTGGCTGTAAGGGACTACHVGGGTWTCTAAT
42	R42	AGCTGTCGGTAAGGACTACHVGGGTWTCTAAT
43	R43	GCAAAGGTCACTGGACTACHVGGGTWTCTAAT
44	R44	CTTAGAATCCGAGGACTACHVGGGTWTCTAAT
45	R45	GTCCGTACCTTGGGACTACHVGGGTWTCTAAT
46	R46	AACGCATGAGGAGGACTACHVGGGTWTCTAAT
47	R47	CTGTTGACTGACGGACTACHVGGGTWTCTAAT
48	R48	GTTACGTATTCGGGACTACHVGGGTWTCTAAT
49	R49	CACCCTCCTAGAGGACTACHVGGGTWTCTAAT
50	R50	TGGTTAGTTGCGGGACTACHVGGGTWTCTAAT
51	R51	CAGTGAGATACGGGACTACHVGGGTWTCTAAT
52	R52	GTTCAGGTGTACGGACTACHVGGGTWTCTAAT
53	R53	TGGCTAATGCCGGGACTACHVGGGTWTCTAAT
54	R54	CTGGTCAGACGAGGACTACHVGGGTWTCTAAT
55	R55	TCTCGATAGGCTGGACTACHVGGGTWTCTAAT
56	R56	TCTATGGTACAGGGACTACHVGGGTWTCTAAT
57	R57	GGTCCAAGGTCTGGACTACHVGGGTWTCTAAT
58	R58	CTCTGCTATCCTGGACTACHVGGGTWTCTAAT
59	R59	TGTGATGGAAGGGGACTACHVGGGTWTCTAAT
60	R60	CCTATCAAGGACGGACTACHVGGGTWTCTAAT
61	R61	TTCTGTTACGCAGGACTACHVGGGTWTCTAAT
62	R62	GTATAGTCTGTGGGACTACHVGGGTWTCTAAT
63	R63	AAGTGCACGTAAGGACTACHVGGGTWTCTAAT
64	R64	AACCAACCTTGGGGACTACHVGGGTWTCTAAT
65	R65	CCTAACCTGGAAGGACTACHVGGGTWTCTAAT
66	R66	GGACGTACTCTCGGACTACHVGGGTWTCTAAT
67	R67	TAAGGTAACGACGGACTACHVGGGTWTCTAAT
68	R68	TGGAATTCCTCCGGACTACHVGGGTWTCTAAT
69	R69	GTTGGTGTTCCTGGACTACHVGGGTWTCTAAT
